# Supplementary material for: LINC00052 regulates the expression of NTRK3 by miR-128 and miR-485-3p to strengthen HCC cells invasion and migration
Source: PubMed Central journal article supplement (PMC5216964; doi:10.18632/oncotarget.10250), 2016-06-23
Supplement: oncotarget-07-47593-s001.pdf [file oncotarget-07-47593-s001.pdf]

## LINC00052 regulates the expression of NTRK3 by miR-128 and miR-485-3p to strengthen HCC cells invasion and migration

### Supplementary Materials

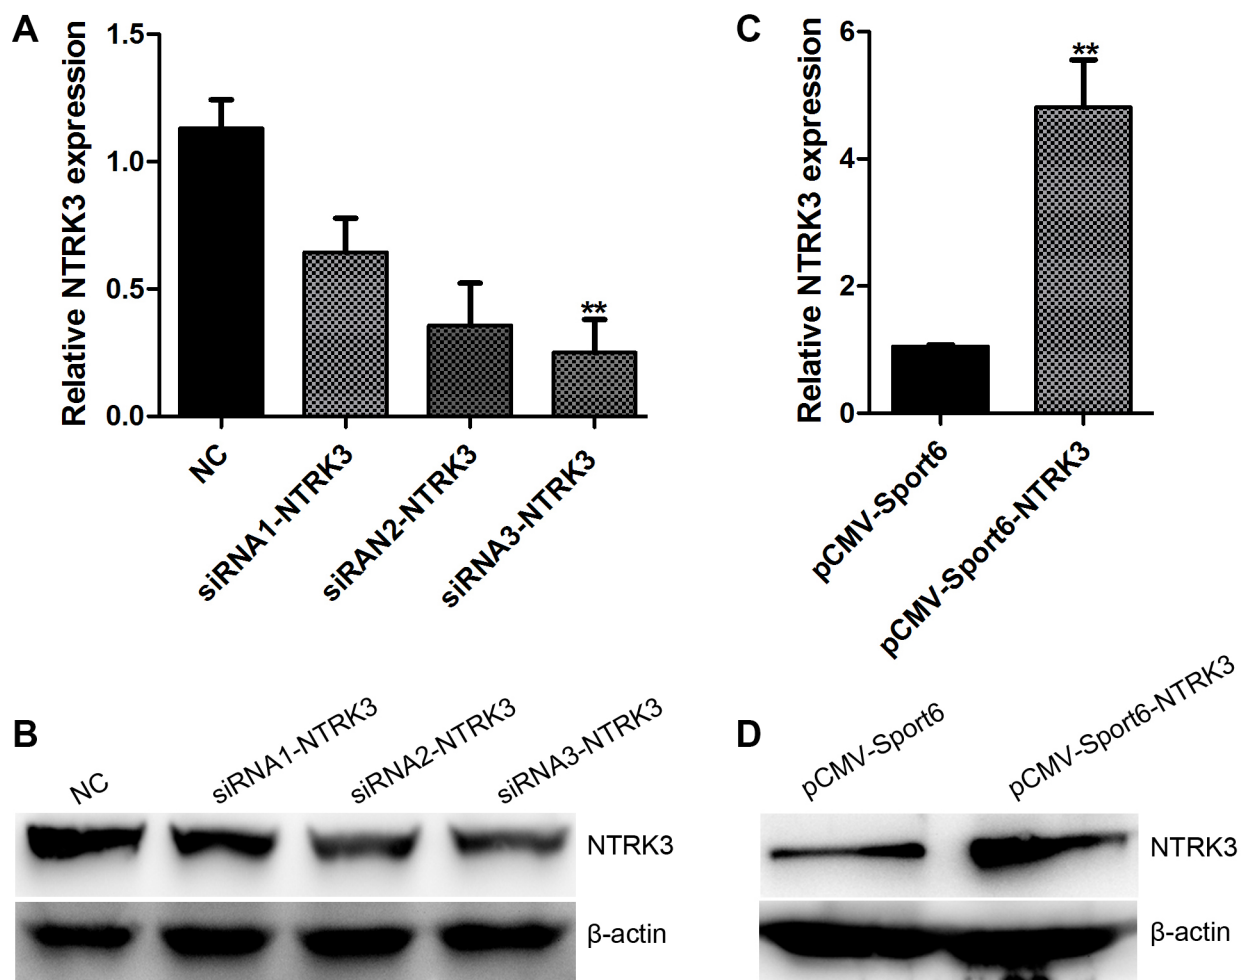

**Supplementary Figure S1: Verification of over expression and siRNAs for NTRK3.** (A), (B) Real-time PCR test and Western blot were used to identify siRNAs of NTRK3 and the siRNA3 has high interference efficiency. (C), (D) Real-time PCR test and Western blot were used to identify over-expression of NTRK3.

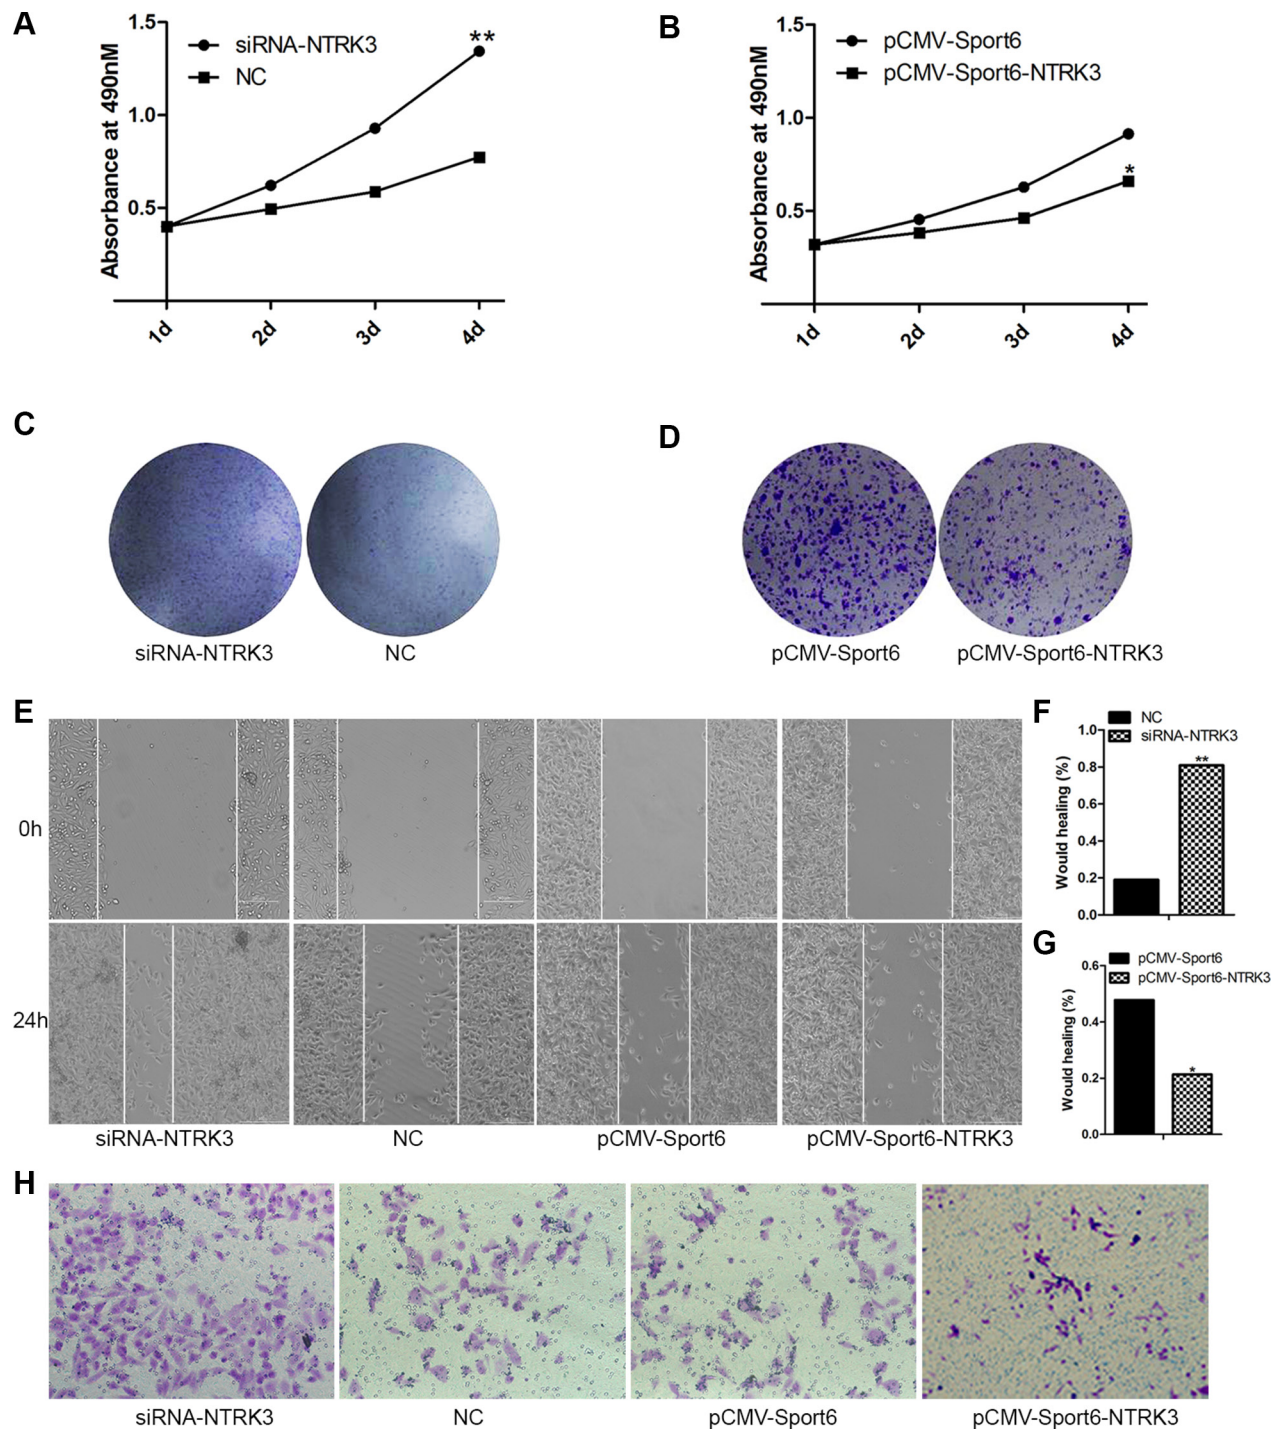

**Supplementary Figure S2: NTRK3 regulated cells proliferation, invasion and migration in SK-Hep1 cells.** The same experiments were performed as Figure 6.
